# Supplementary material for: Geranylgeraniol Prevents Statin-Dependent Myotoxicity in C2C12 Muscle Cells through RAP1 GTPase Prenylation and Cytoprotective Autophagy
Source: PubMed Central journal article supplement (PMC5987243; doi:10.1155/2018/6463807), 2018-05-21

**A**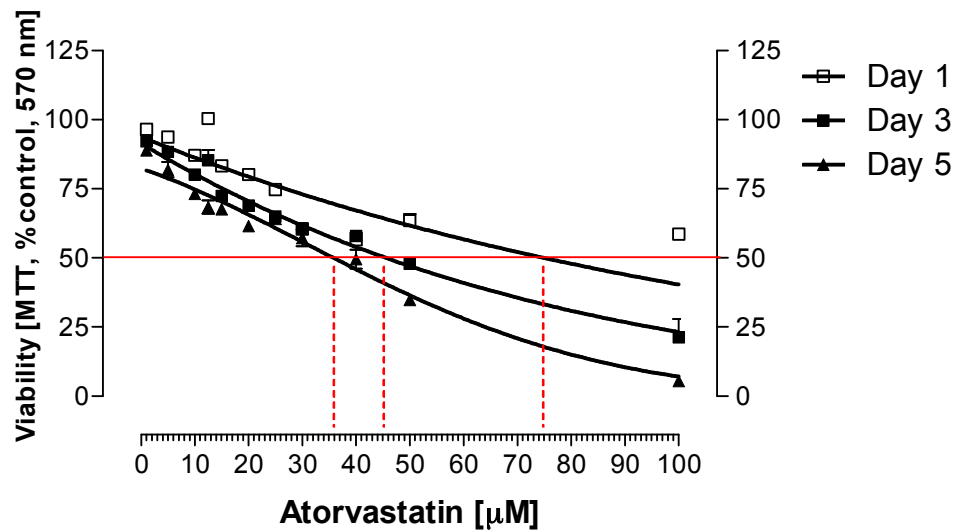**B**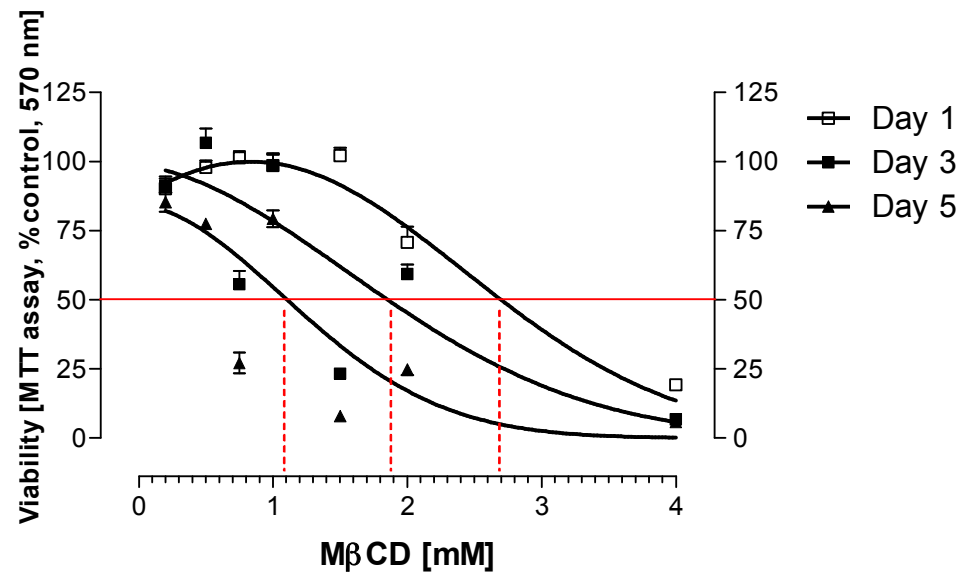**C**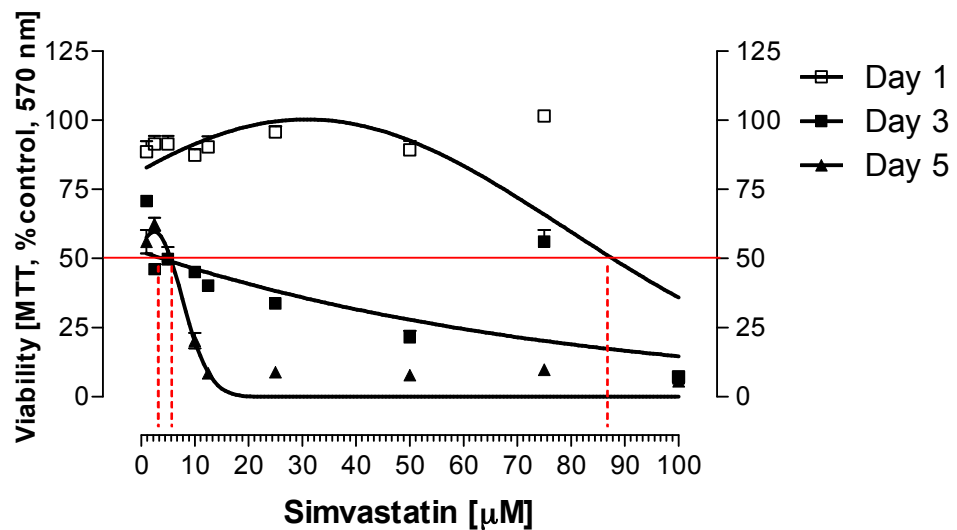**D**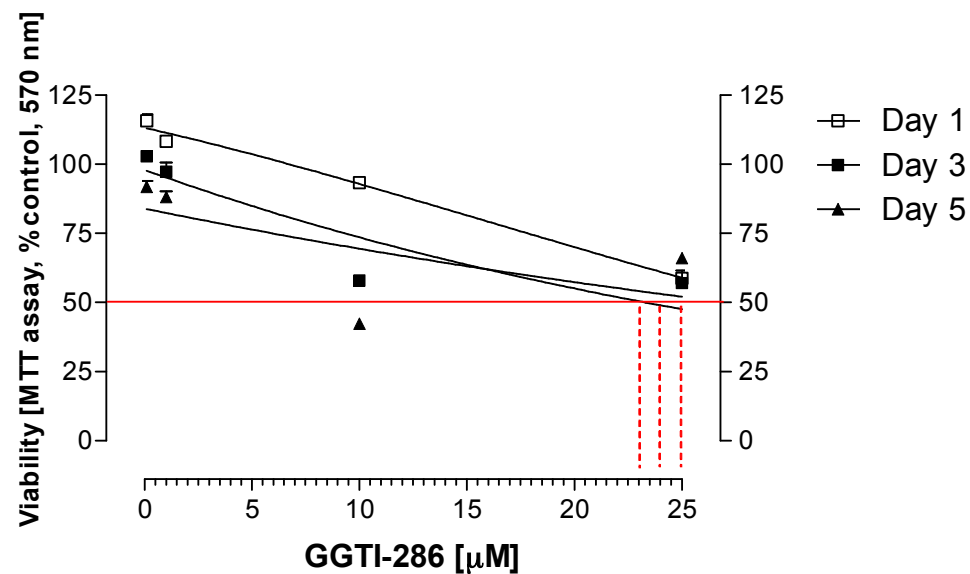

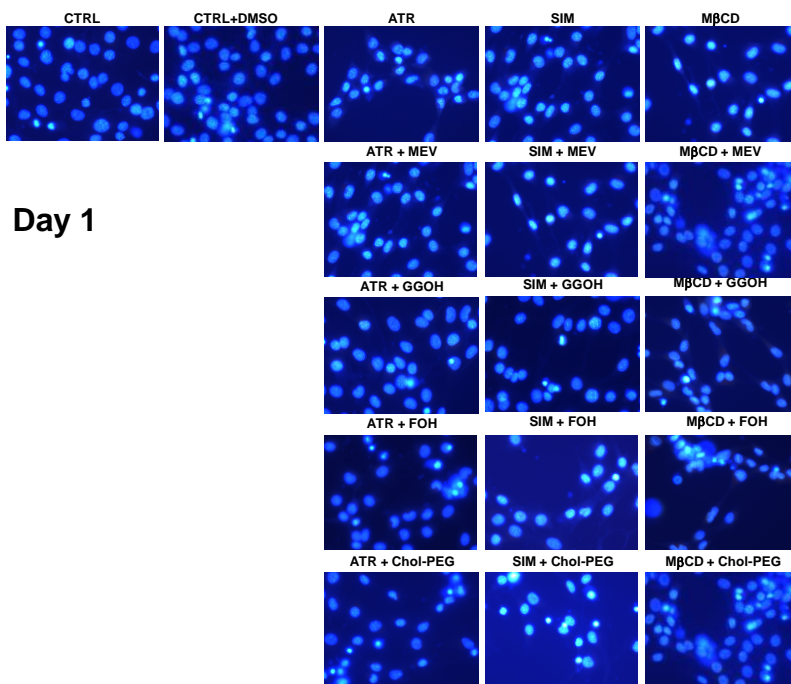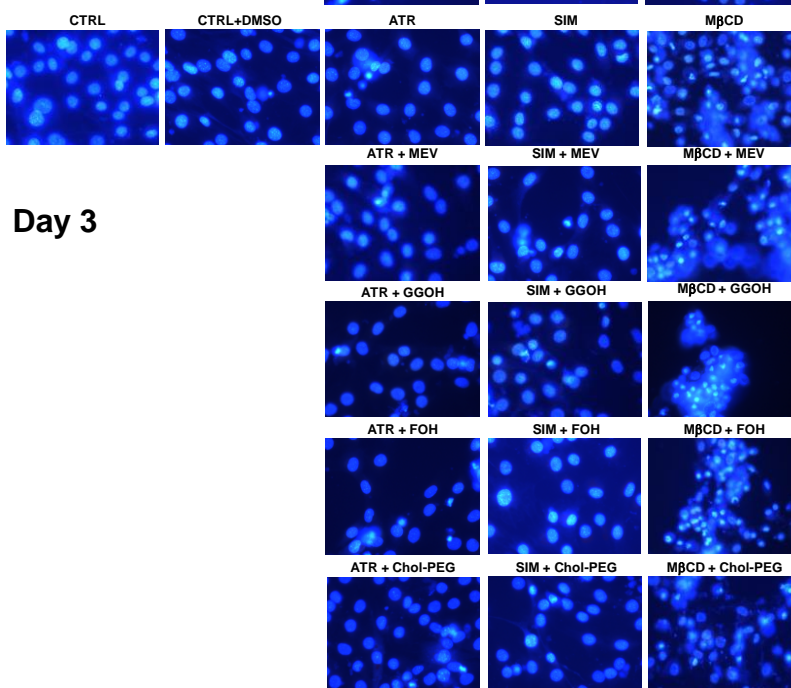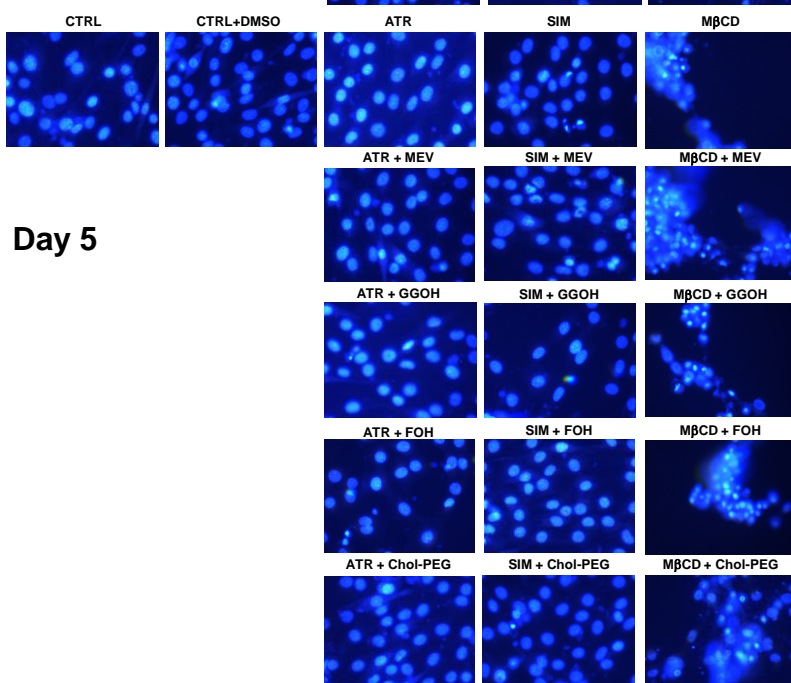

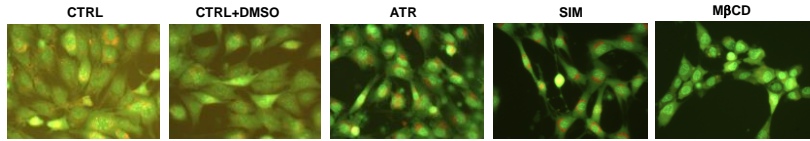

Day 1

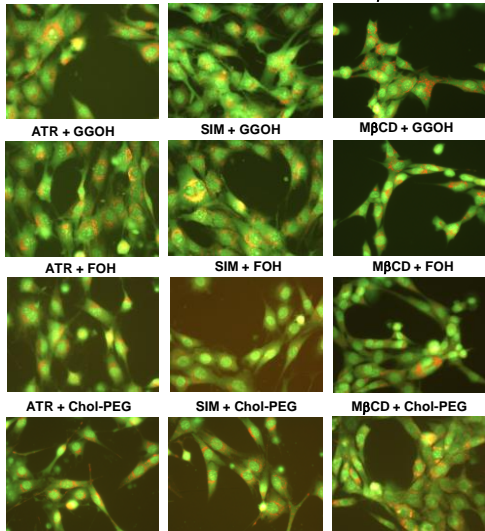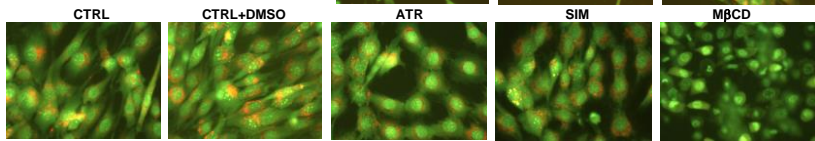

Day 3

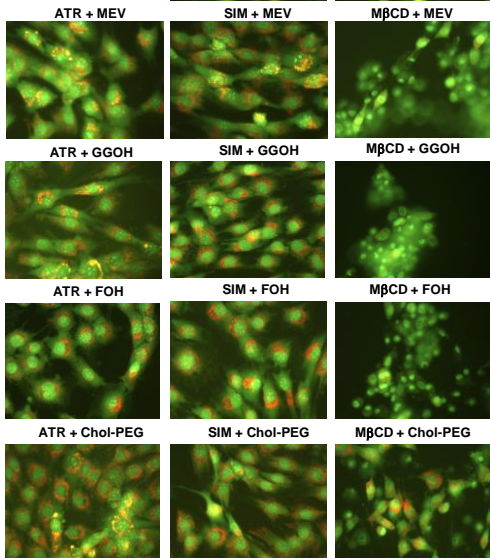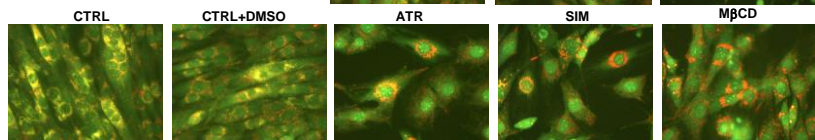

Day 5

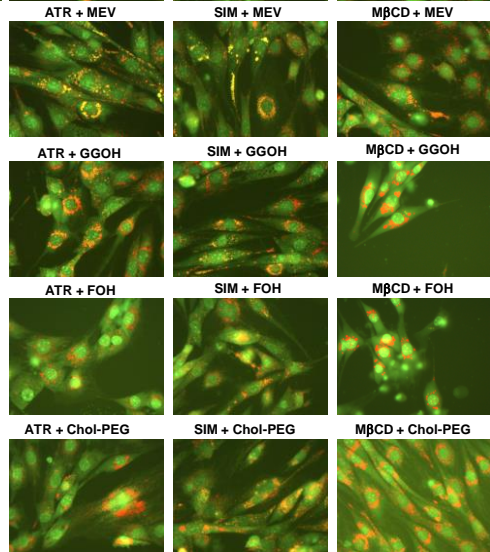

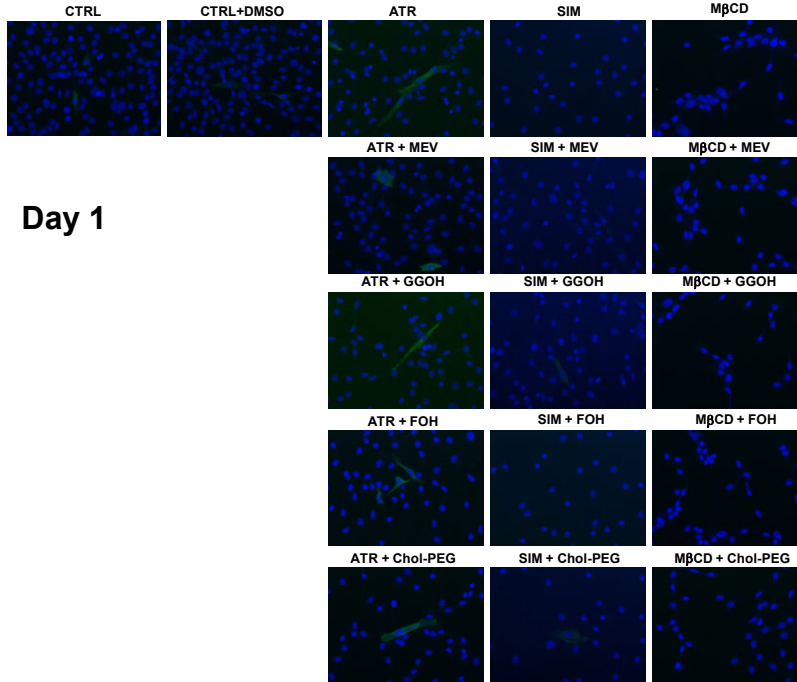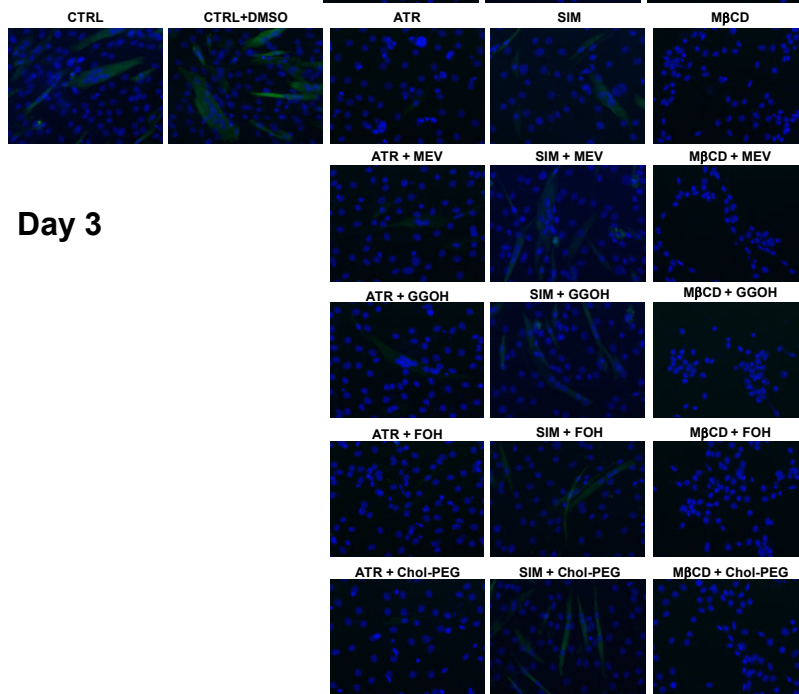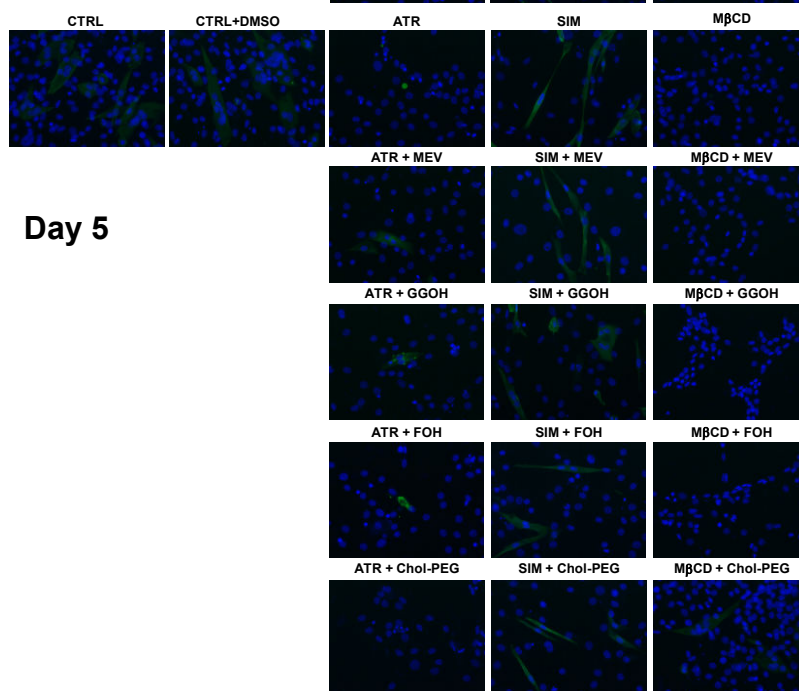

Supplement: 6463807.f1.pdf [file 6463807.f1.pdf]
